# Supplementary material for: Future material demand and greenhouse gas emissions implications for electrification of the UK light-duty vehicle fleet
Source: Royal Society of Chemistry journal article supplement (doi:10.1039/d4su00112e), 2024-01-01
Supplement: d4su00112e1.pdf [file d4su00112e1.pdf]

## Title

Future Material Demand and Greenhouse Gas Emissions Implications for Electrification of the UK Light-Duty Vehicle Fleet

## Authors

Ben Davies<sup>1, \*</sup>

Jorge A. Llamas-Orozco<sup>1</sup>

Fanran Meng<sup>2, \*\*</sup>

I. Daniel Posen<sup>3</sup>

Heather L. MacLean<sup>3</sup>

Amir F. N. Abdul-Manan<sup>4</sup>

Jon McKechnie<sup>1</sup>

## Affiliations

1. Low Carbon Energy and Resource Technologies, University of Nottingham, Nottingham, United Kingdom
2. Department of Chemical & Biological Engineering, University of Sheffield, Sheffield, United Kingdom
3. Department of Civil & Mineral Engineering, University of Toronto, Toronto, Ontario, Canada
4. Strategic Transport Analysis Team, Transport Technologies R&D, Research & Development Center (R&D), Saudi Aramco, Dhahran, Saudi Arabia

## Correspondence

\* Ben.Davies@nottingham.ac.uk, +44(0)115 951 4002

\*\* F.Meng@sheffield.ac.uk, +44(0)114 222 7510

# Supplementary model information

## Vehicles module

Table S1: Kerb weight by vehicle technology [1].

| Vehicle technology | Fixed kerb weight, less traction battery, kg | Kerb weight including 2020 market battery, kg |
|--------------------|----------------------------------------------|-----------------------------------------------|
| P-ICEV             | 1369                                         | 1369                                          |
| D-ICEV             | 1796                                         | 1796                                          |
| HEV                | 2032                                         | 2090                                          |
| PHEV               | 2032                                         | 2090                                          |
| BEV                | 1830                                         | 2158                                          |

Table S2: Materials composition by vehicle technology, adopted from [2].

| Material            | P-ICEV | D-ICEV | HEV   | PHEV  | BEV   |
|---------------------|--------|--------|-------|-------|-------|
| Steel               | 59.9%  | 59.9%  | 59.3% | 58.8% | 58.4% |
| Wrought Aluminium   | 4.6%   | 4.6%   | 2.7%  | 2.6%  | 3.0%  |
| Cast Aluminium      | 8.2%   | 8.2%   | 9.7%  | 10.3% | 10.7% |
| Copper              | 2.4%   | 2.4%   | 4.0%  | 4.6%  | 6.3%  |
| Automotive Plastics | 15.3%  | 15.3%  | 12.6% | 12.2% | 14.3% |
| Rubber              | 3.9%   | 3.9%   | 3.3%  | 3.2%  | 3.3%  |
| Platinum            | 0.0%   | 0.0%   | 0.0%  | 0.0%  | 0.0%  |

Table S3: Fuel and energy consumption by vehicle technology, adopted from [3].

| Vehicle technology | Fuel consumption, l/100 km | Vehicle technology | Electricity consumption, kWh/100 km |
|--------------------|----------------------------|--------------------|-------------------------------------|
| P-ICEV             | 6.15                       | PHEV               | 17.3                                |
| D-ICEV             | 5.87                       | BEV                | 17.7                                |
| HEV                | 5.17                       |                    |                                     |
| PHEV               | 1.94                       |                    |                                     |

PHEV fleet-class average utility factor = 0.818

Table S4: Vehicle battery capacity for electrified powertrains, adopted from [2].

| Vehicle technology | Battery capacity, kWh |
|--------------------|-----------------------|
| HEV                | 15.0                  |
| PHEV               | 15.0                  |
| BEV                | 84.0                  |

Table S5: Materials composition by battery chemistry, adopted from [4]

| Material          | NMC111 | NMC532 | NMC622 | NMC811 | NMC955 | NCA   | LFP   |
|-------------------|--------|--------|--------|--------|--------|-------|-------|
| LiCO <sub>3</sub> | 14.6%  | 14.7%  | 13.8%  | 0.0%   | 0.0%   | 0.0%  | 8.4%  |
| NiSO <sub>4</sub> | 20.4%  | 31.6%  | 34.6%  | 40.1%  | 45.1%  | 44.7% | 0.0%  |
| MnSO <sub>4</sub> | 19.9%  | 18.0%  | 11.2%  | 4.9%   | 2.5%   | 0.0%  | 0.0%  |
| CoSO <sub>4</sub> | 20.4%  | 12.8%  | 11.5%  | 5.0%   | 2.5%   | 8.5%  | 0.0%  |
| LiOH              | 0.0%   | 0.0%   | 0.0%   | 7.8%   | 7.8%   | 8.6%  | 9.7%  |
| Graphite          | 20.2%  | 20.6%  | 22.1%  | 24.4%  | 24.4%  | 23.4% | 19.1% |
| Copper            | 7.2%   | 7.2%   | 7.1%   | 7.2%   | 7.2%   | 6.8%  | 8.3%  |
| Aluminium         | 17.3%  | 17.3%  | 17.8%  | 18.4%  | 18.4%  | 18.0% | 17.5% |

## Fleet module

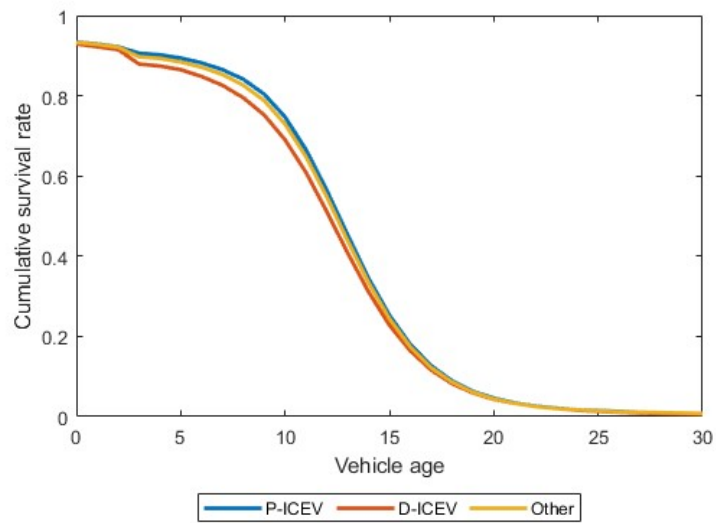

Figure S1: Cumulative vehicle survival rate by age for fleet-average vehicle technologies, calculated from [5]. Due to insufficient data, HEV, PHEV, and BEV follow the fleet average for “Other” technologies.

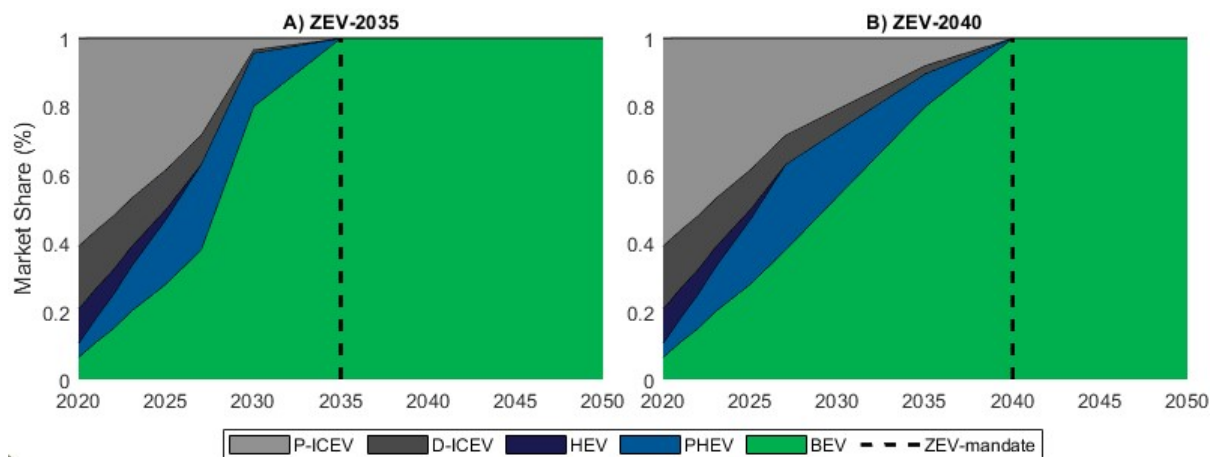

Figure S2: Fleet vehicle market scenarios, adapted from [6].

## Materials and manufacturing module

Table S6: Primary and secondary materials production emissions factor for bulk vehicle materials.

| Material          | Primary production, kg CO <sub>2</sub> eq./kg | Secondary production, kg CO <sub>2</sub> eq./kg |
|-------------------|-----------------------------------------------|-------------------------------------------------|
| Steel             | 1.978                                         | 1.225                                           |
| Wrought Aluminium | 13.840                                        | 0.813                                           |
| Cast Aluminium    | 5.685                                         | 0.813                                           |
| Copper            | 7.199                                         | 0.017                                           |
| Plastic           | 4.149                                         | 0.000                                           |
| Rubber            | 4.777                                         | 0.000                                           |
| Platinum          | 120290                                        | 35737                                           |

## Batteries module scenarios

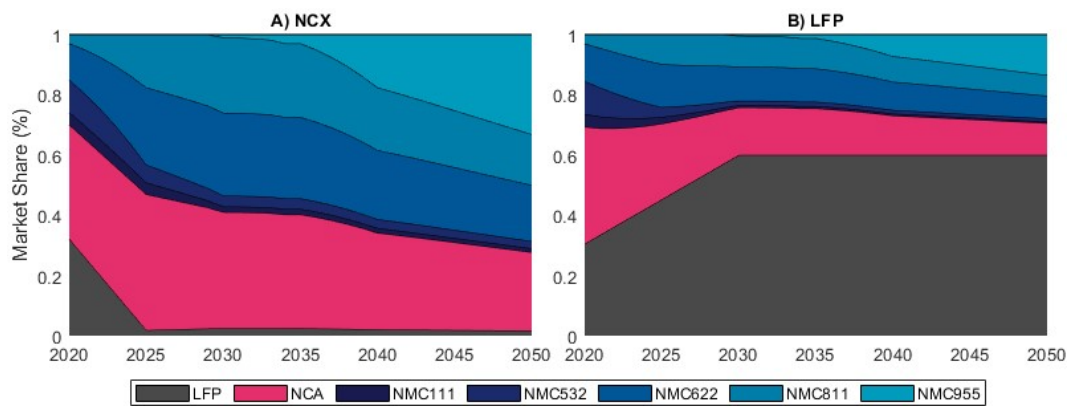

Figure S3: Battery chemistry market scenarios, adopted from [7].

## Fuel and energy module scenarios

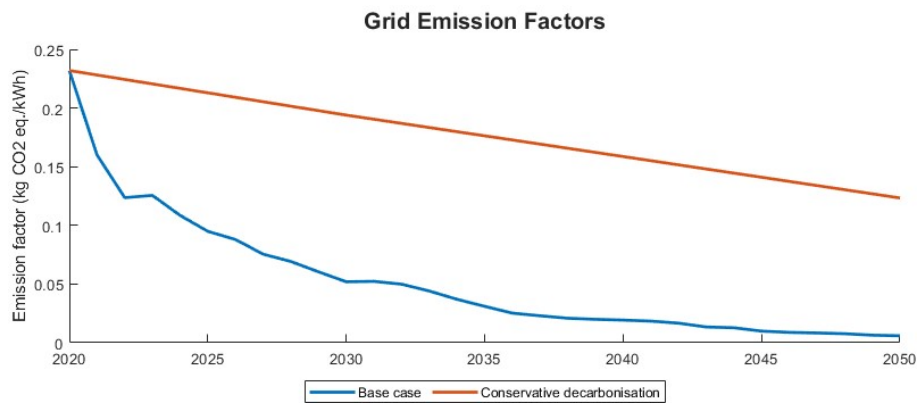

Figure S4: Grid generation emissions factor scenarios.

## Life cycle assessment emissions factors

Table S7: Summary of life cycle inventory datasets consulted from the ecoinvent database [8].

| <b>ecoinvent dataset</b>                                                                                        |
|-----------------------------------------------------------------------------------------------------------------|
| steel production, low-alloyed, hot rolled_RER_2020_Allocation, cut-off                                          |
| steel production, chromium steel 18_8, hot rolled_RER_2020_Allocation, cut-off                                  |
| aluminium production, primary, ingot_IAI Area, EU27 & EFTA_2020_Allocation, cut-off                             |
| aluminium ingot, primary, to aluminium, wrought alloy market_GLO_2020_Allocation, cut-off                       |
| aluminium ingot, primary, to aluminium, cast alloy market_GLO_2020_Allocation, cut-off                          |
| sheet rolling, aluminium_RER_2020_Allocation, cut-off                                                           |
| copper production, cathode, solvent extraction and electrowinning process_GLO_2020_Allocation, cut-off          |
| wire drawing, copper_RER_2020_Allocation, cut-off                                                               |
| acrylonitrile-butadiene-styrene copolymer production_RER_2020_Allocation, cut-off                               |
| epoxy resin, liquid_RER_2020_Allocation, cut-off                                                                |
| fibre, viscose_GLO_2020_Allocation, cut-off                                                                     |
| polyethylene production, high density, granulate_RER_2020_Allocation, cut-off                                   |
| polypropylene, granulate_GLO_2020_Allocation, cut-off                                                           |
| polyphenylene sulfide_GLO_2020_Allocation, cut-off                                                              |
| polyurethane, flexible foam_RER_2020_Allocation, cut-off                                                        |
| printed wiring board, mounted mainboard, desktop computer, Pb free_GLO_2020_Allocation, cut-off                 |
| carbon fibre reinforced plastic, injection moulded_GLO_2020_Allocation, cut-off                                 |
| synthetic rubber production_RER_2020_Allocation, cut-off                                                        |
| platinum group metal, extraction and refinery operations_ZA_2020_Allocation, cut-off                            |
| road vehicle factory_GLO_2020_Allocation, cut-off                                                               |
| petrol production, low-sulfur_Europe without Switzerland_2020_Allocation, cut-off                               |
| diesel production, low-sulfur, petroleum refinery operation_Europe without Switzerland_2020_Allocation, cut-off |
| manual dismantling of used passenger car with internal combustion engine_GLO_2020_Allocation, cut-off           |
| treatment of used glider, passenger car, shredding_GLO_2020_Allocation, cut-off                                 |
| treatment of used internal combustion engine, shredding_GLO_2020_Allocation, cut-off                            |
| treatment of used powertrain for electric passenger car, manual dismantling_GLO_2020_Allocation, cut-off        |
| treatment of automobile catalyst_RER_2020_Allocation, cut-off                                                   |

# Supplementary model results

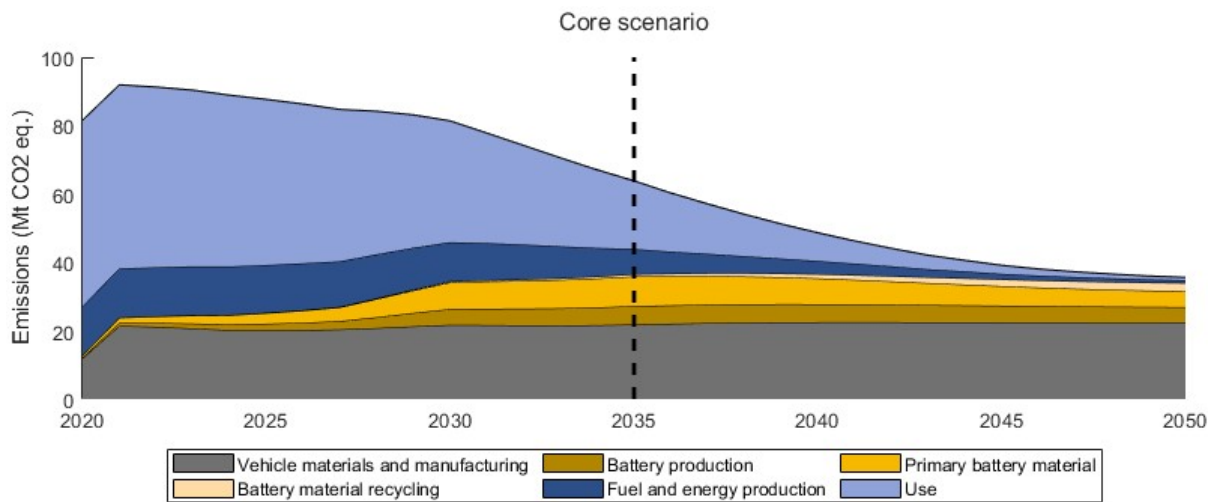

Figure S5: Annual GHG emission results for the Core scenario.

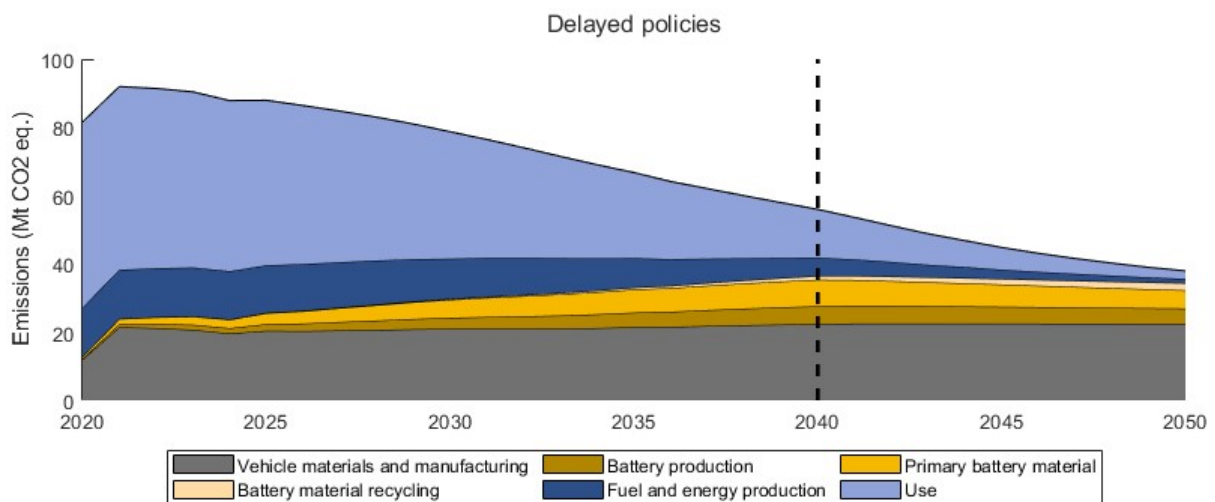

Figure S6: Annual GHG emission results for the Delayed policies scenario.

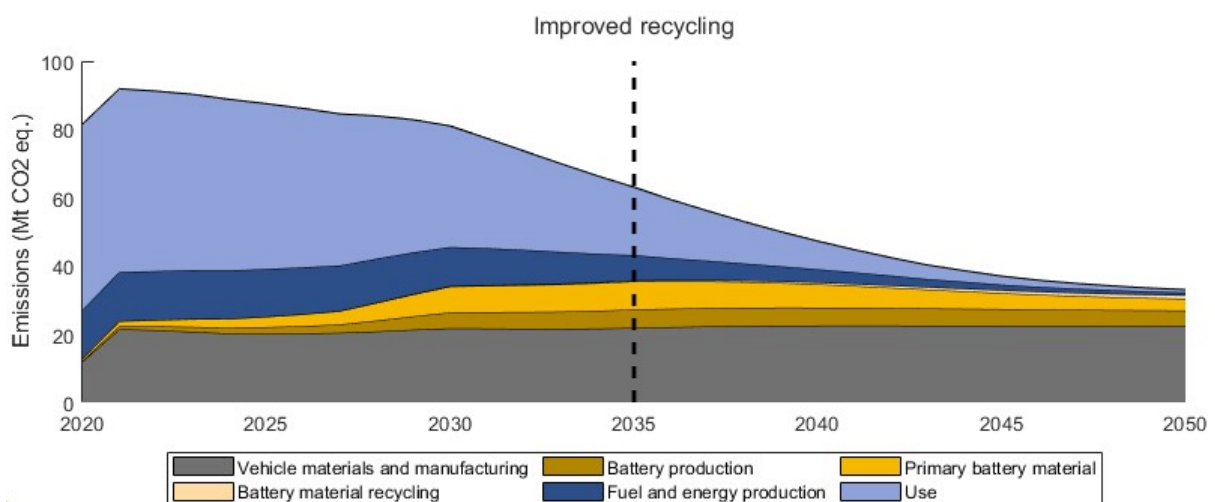

Figure S7: Annual GHG emission results for the Improved recycling scenario.

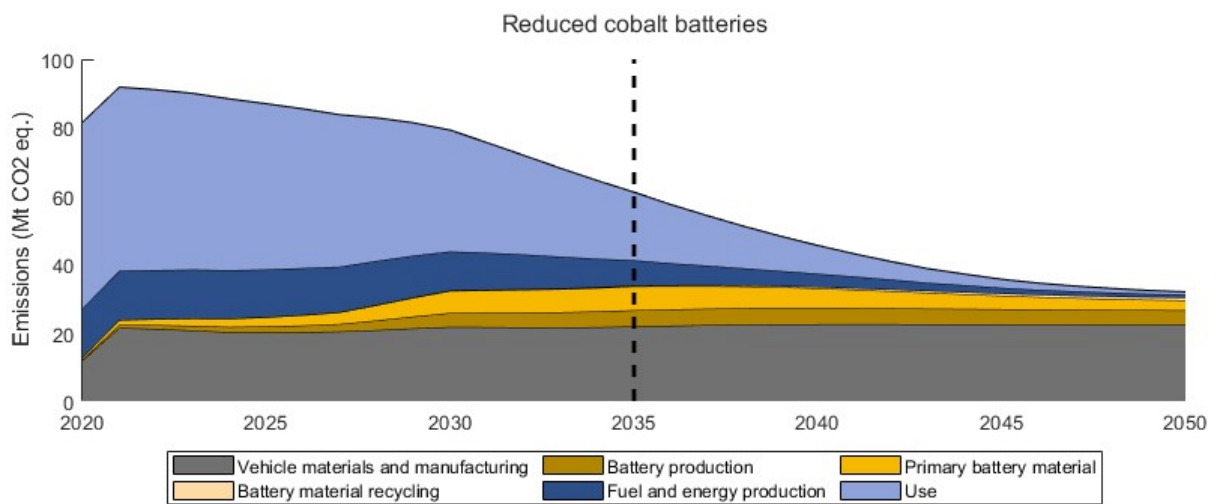

Figure S8: Annual GHG emission results for the Reduced cobalt batteries scenario.

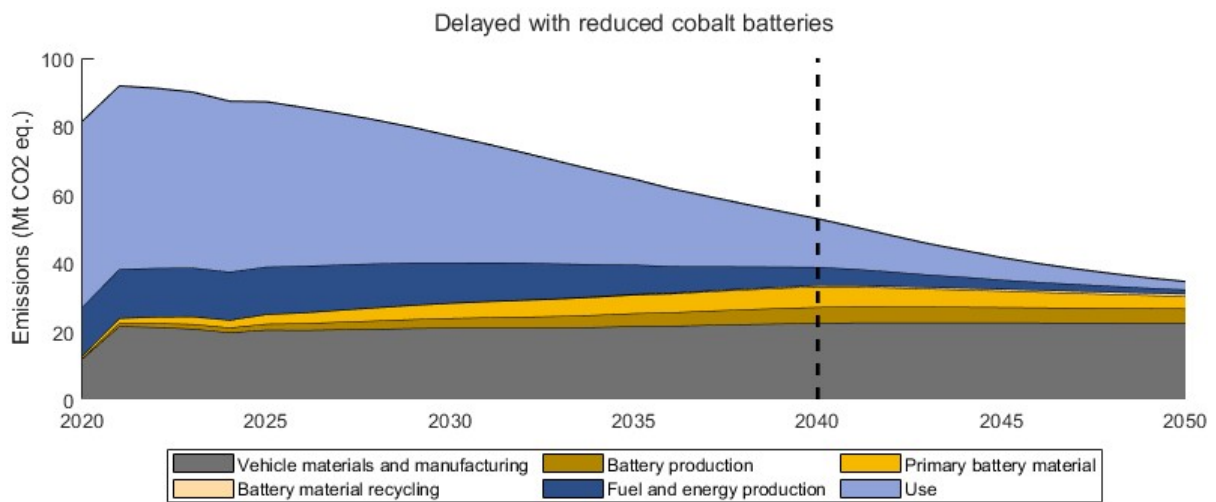

Figure S9: Annual GHG emission results for the Delayed with reduced cobalt batteries scenario.

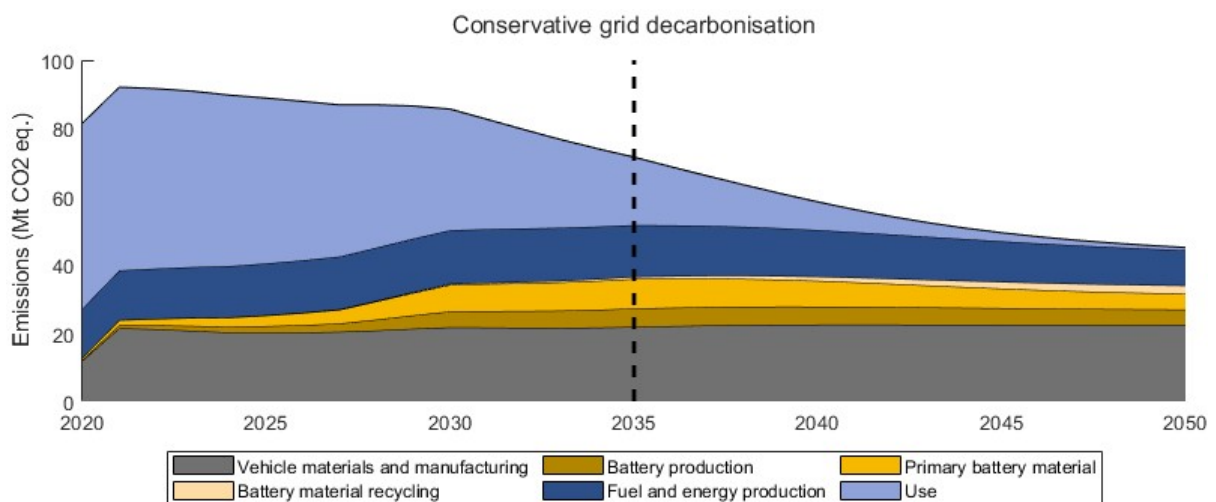

Figure S10: Annual GHG emission results for the Conservative grid decarbonisation scenario.

## References

- [1] European Environment Agency, “Monitoring of CO<sub>2</sub> emissions from passenger cars Regulation (EU) 2019/631,” 2023. [Online]. Available: [co2cars.apps.eea.europa.eu](https://co2cars.apps.eea.europa.eu)
- [2] GREET, “GREET Life Cycle Model User Guide,” *Argonne National Laboratory*, pp. 169–232, 2020, [Online]. Available: [www.impact-test.co.uk](http://www.impact-test.co.uk)
- [3] Vehicle Certification Agency, “Fuel Consumption & CO<sub>2</sub> Databases.” Accessed: Jun. 05, 2023. [Online]. Available: <https://www.vehicle-certification-agency.gov.uk/fuel-consumption-co2/>
- [4] J. A. Llamas-Orozco *et al.*, “Estimating the Environmental Impacts of Global Lithium-Ion Battery Supply Chain: A Temporal, Geographical, and Technological Perspective,” *PNAS Nexus*, vol. 2, no. 11, pp. 1–16, 2023, doi: 10.1093/pnasnexus/pgad361.
- [5] Department for Transport and Driver and Vehicle Licensing Agency, “Vehicle licensing statistics: 2022,” National statistics. [Online]. Available: <https://www.gov.uk/government/statistics/vehicle-licensing-statistics-2022>
- [6] Department for Transport, “Zero emission vehicle (ZEV) mandate consultation: Summary of responses and joint government response,” 2023.
- [7] C. Xu, Q. Dai, L. Gaines, M. Hu, A. Tukker, and B. Steubing, “Future material demand for automotive lithium-based batteries,” *Commun Mater*, vol. 1, no. 1, p. 99, Dec. 2020, doi: 10.1038/s43246-020-00095-x.
- [8] ecoInvent, “ecoinvent database V3.7.” Accessed: May 25, 2022. [Online]. Available: <https://ecoinvent.org/>
